# Supplementary material for: Corrosion and hydrogen evolution rate control for X-65 carbon steel based on chitosan polymeric ionic liquids: experimental and quantum chemical studies
Source: Royal Society of Chemistry journal article supplement (doi:10.1039/c8ra05444d), 2018-01-01
Supplement: c8ra05444d1.pdf [file c8ra05444d1.pdf]

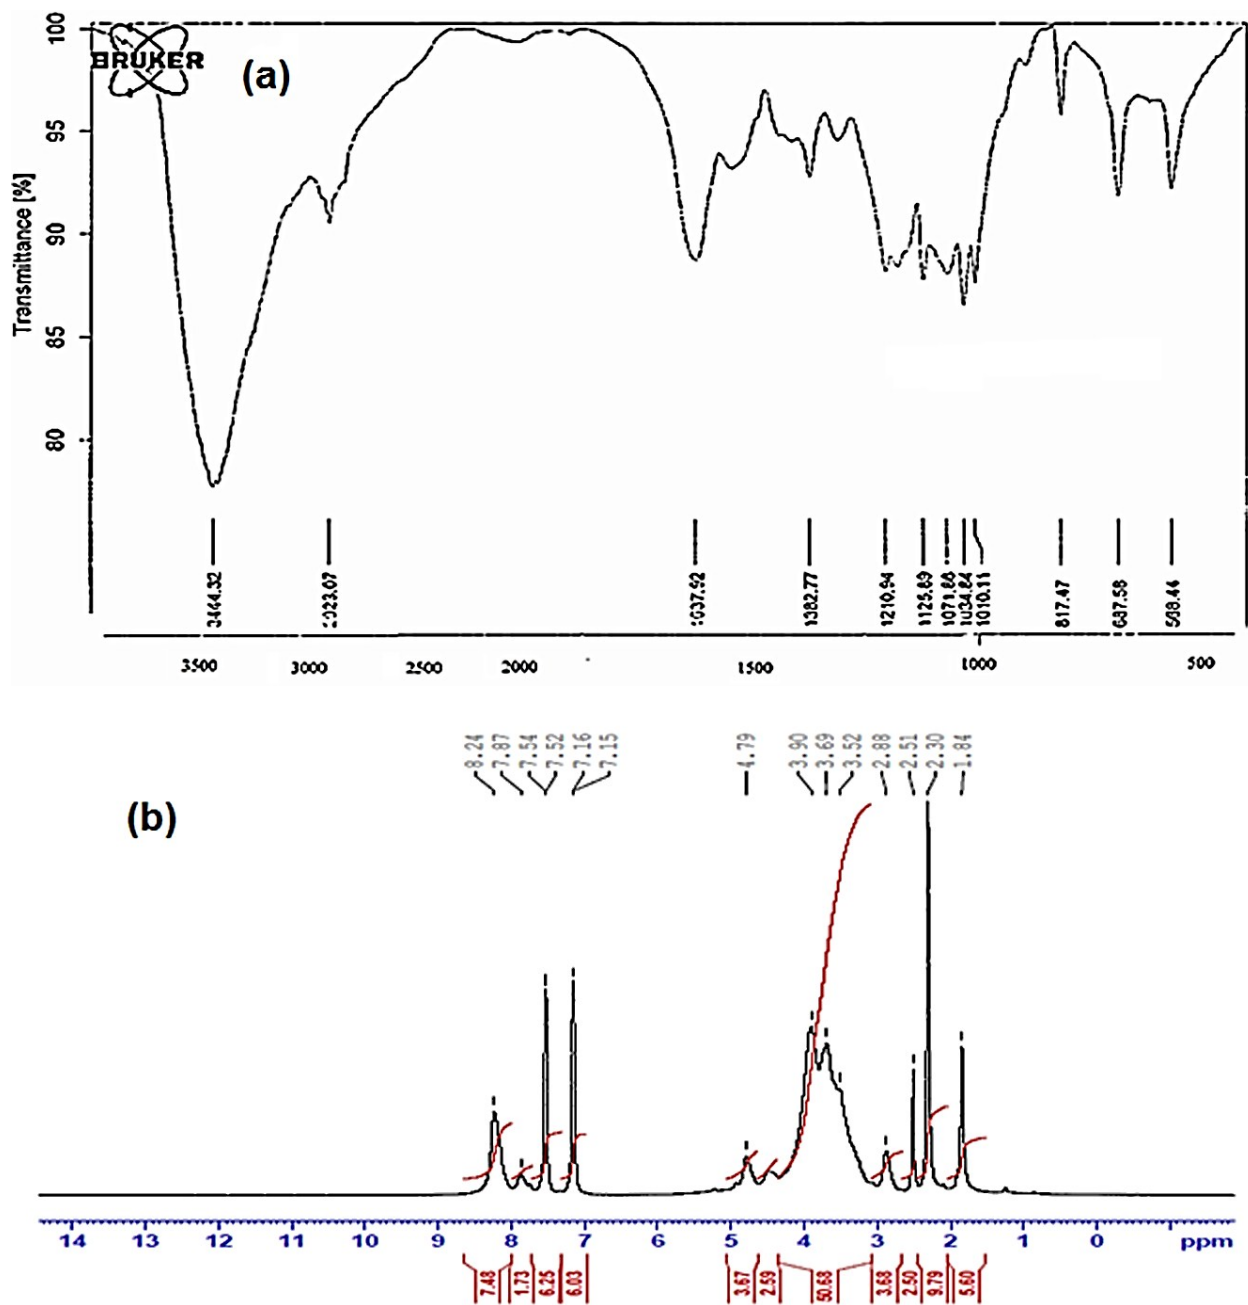

S1: Chemical structure characterization of CSPTA, (a) FTIR, (b) <sup>1</sup>H-NMR.

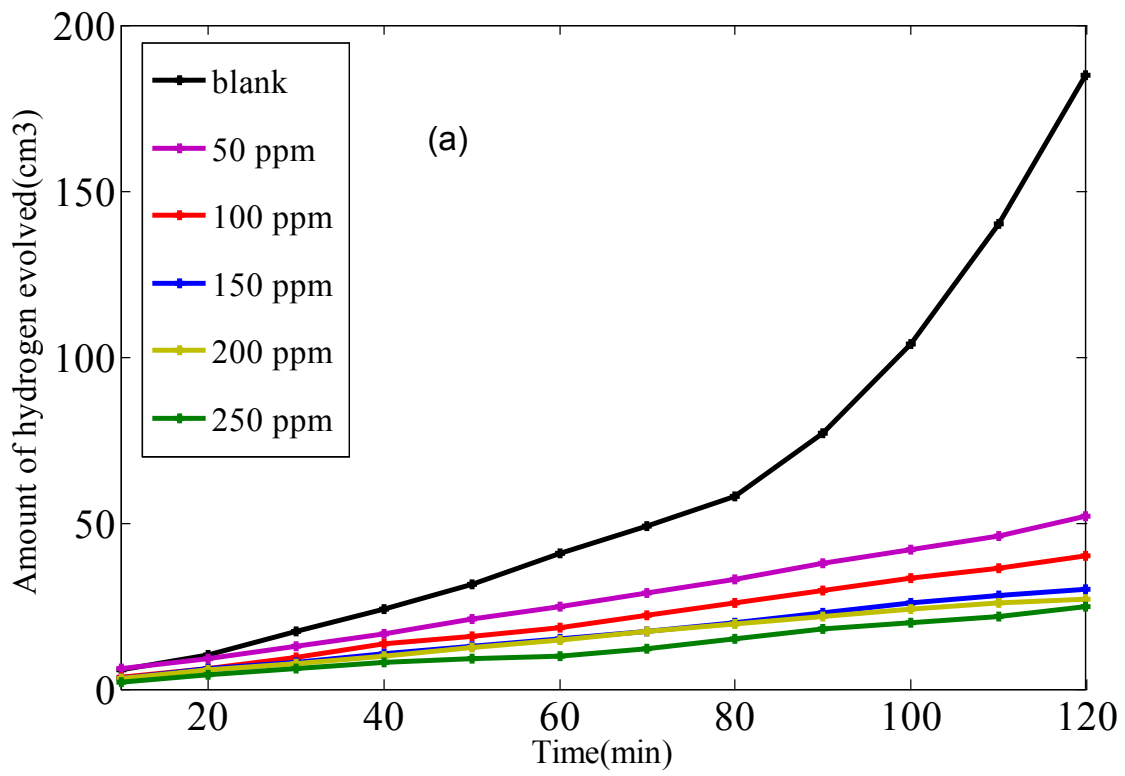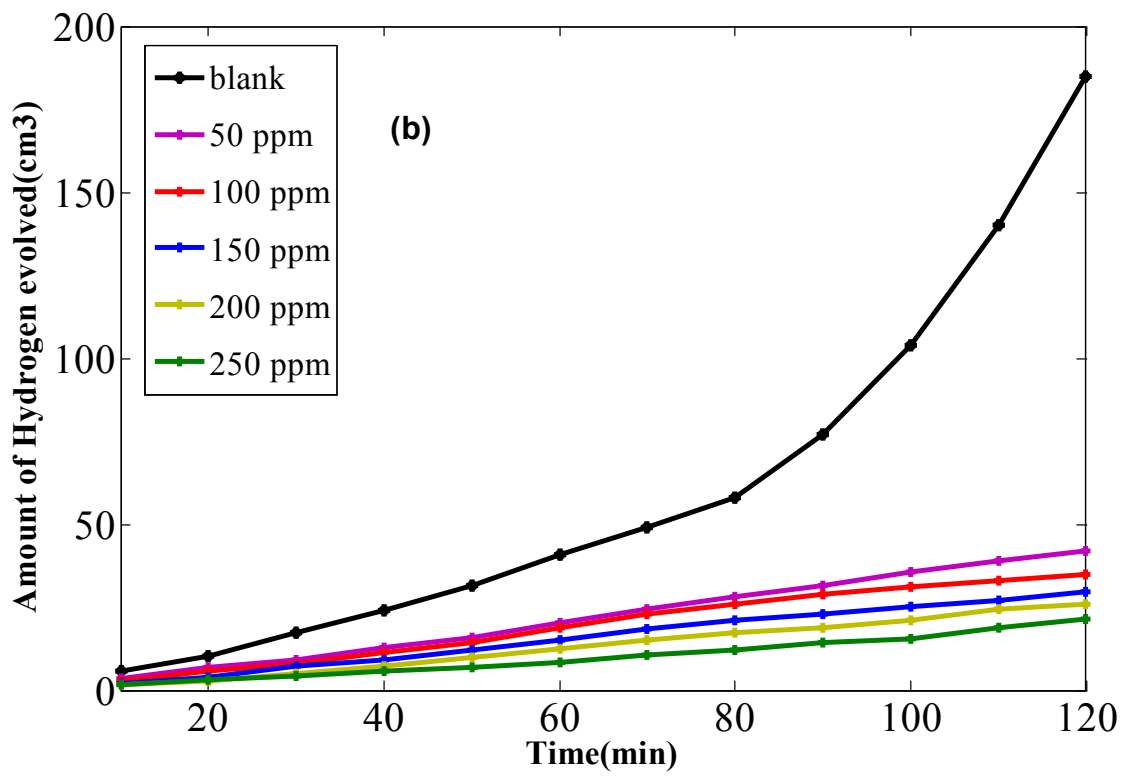

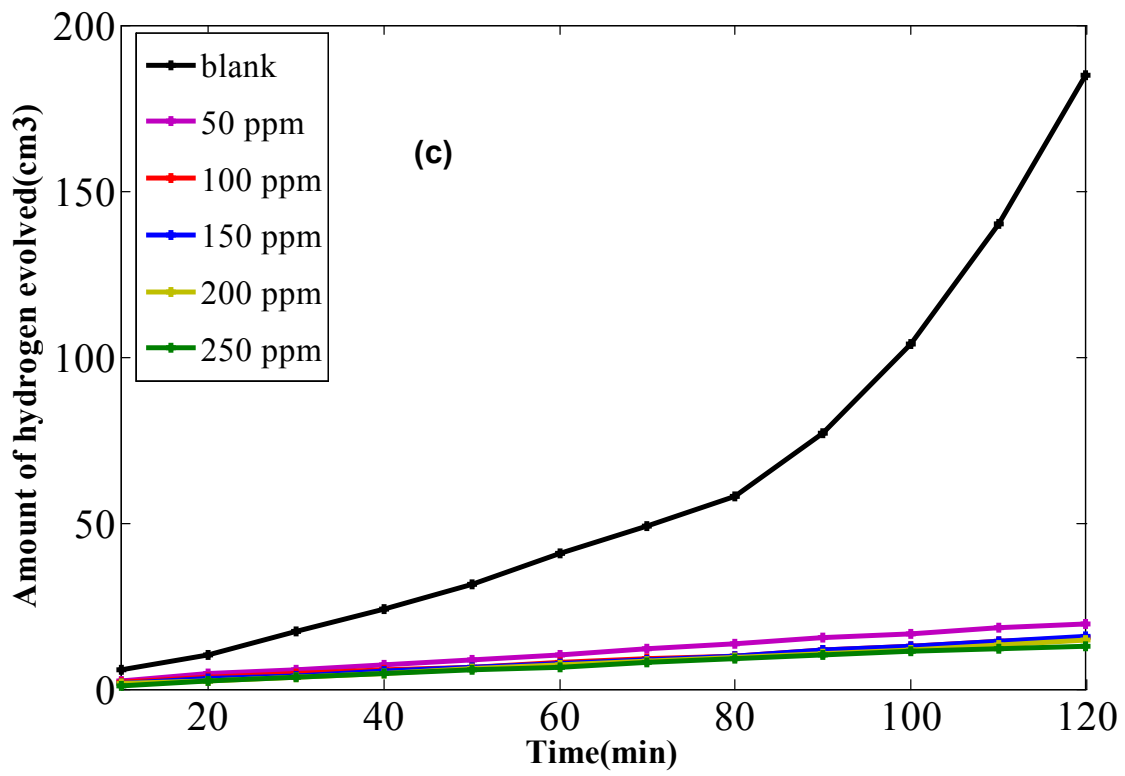

S2: Volume of hydrogen evolved with time for carbon steel in 1 M HCl at various concentrations of (a) CSPTA-Stearic, (b) CSPTA-Palmitic, (c) CSPTA-Myristic.

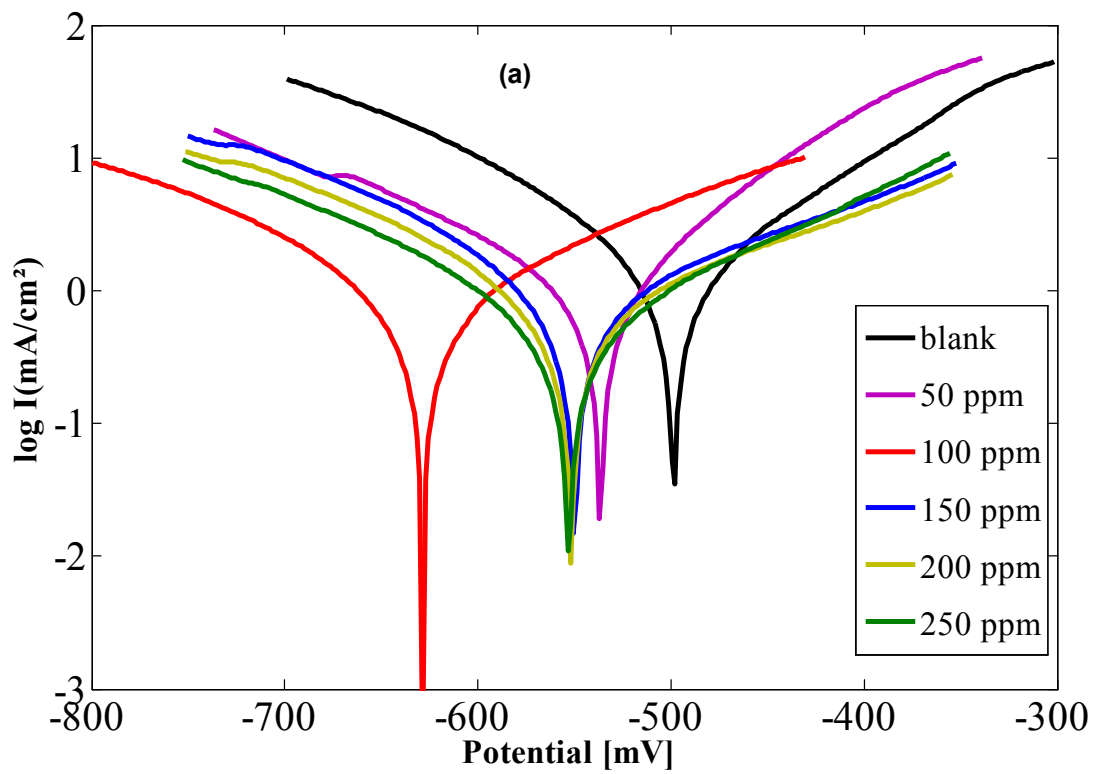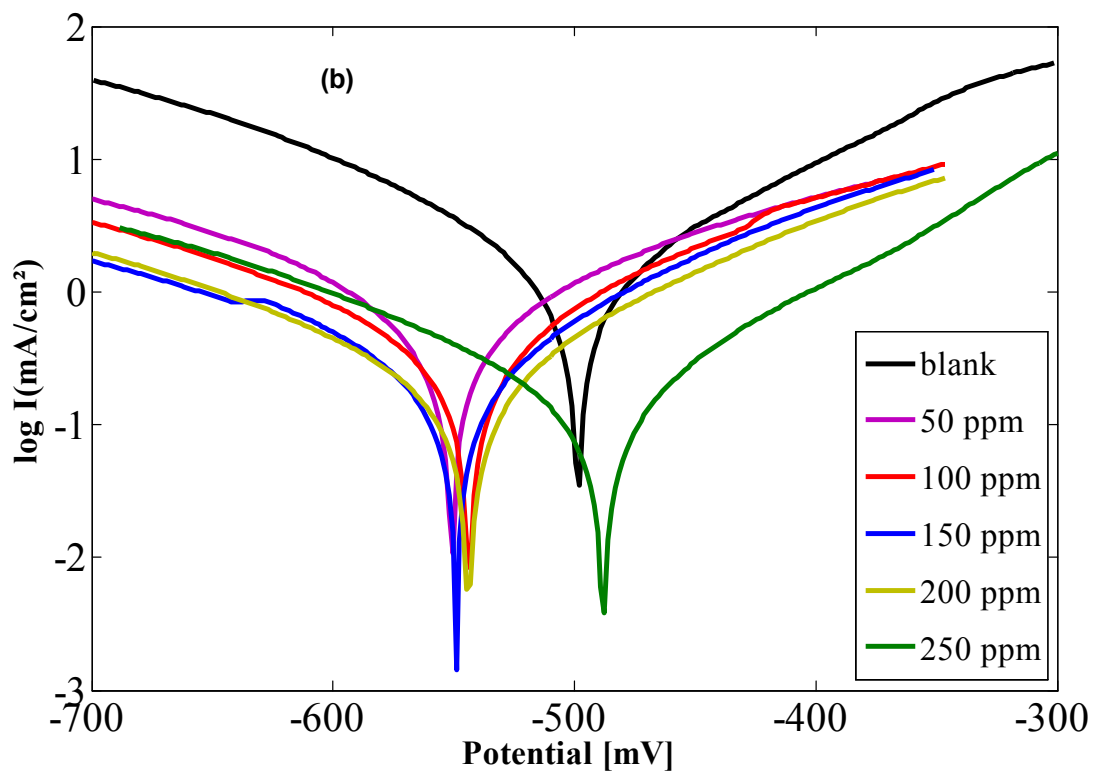

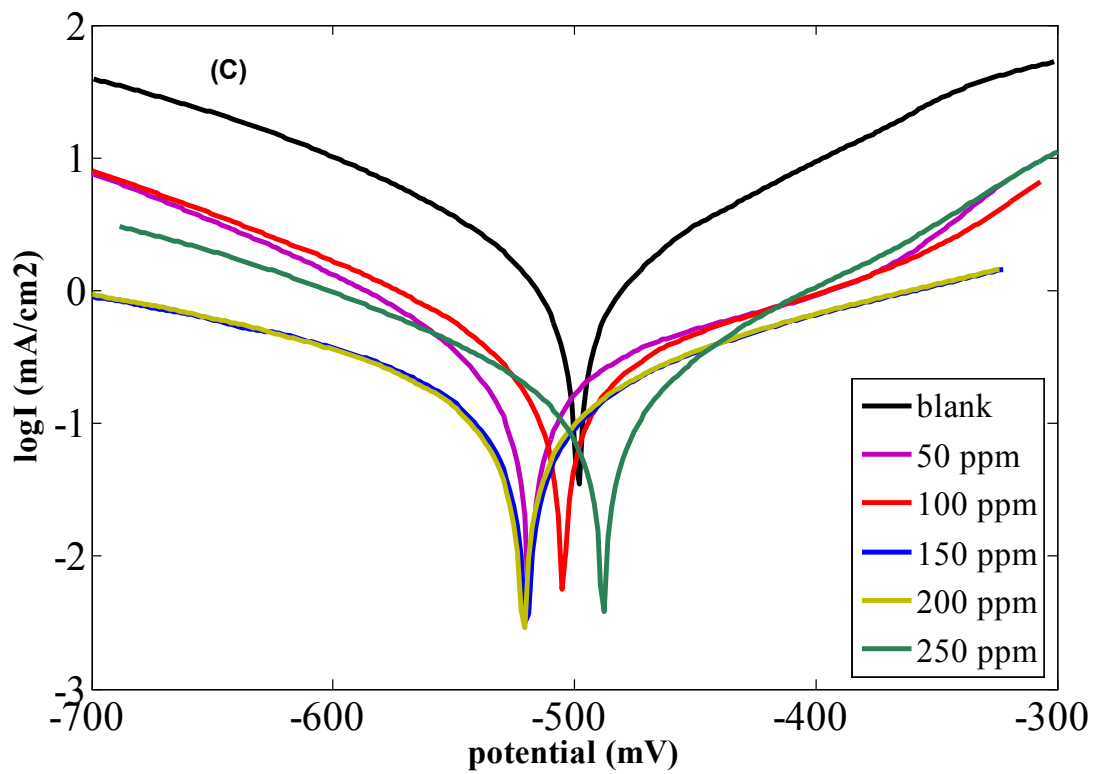

**S3:** Polarization plots of steel electrode obtained in 1 M HCl solution and containing various concentrations of (a) CSPTA-Stearic, (b) CSPTA-Palmitic, (c) CSPTA-Myristic.

**S4:** Values of Mean and standard deviation (SD) for corrosion current density for carbon steel electrode at different concentrations of PILs inhibitors in 1 M HCl solution.

| <b>Inhibitor</b>      | <b>Concentration (ppm)</b> | <b>Mean value</b> | <b>SD value</b> |
|-----------------------|----------------------------|-------------------|-----------------|
| <b>blank</b>          | 000                        | 0.8826            | ±0.6063         |
| <b>CSPTA- Stearic</b> | 50                         | 0.7305            | ±0.6158         |
|                       | 100                        | 0.4174            | ±0.5606         |
|                       | 150                        | 0.4415            | ±0.5155         |
|                       | 200                        | 0.3425            | ±0.5109         |
|                       | 250                        | 0.2932            | ±0.5379         |
| <b>CSPTA-Palmitic</b> | 50                         | 0.3175            | ±0.504          |
|                       | 100                        | 0.18              | ±0.5443         |
|                       | 150                        | 0.01232           | ±0.564          |
|                       | 200                        | -0.02786          | ±0.5682         |
|                       | 250                        | -0.09302          | ±0.6154         |
| <b>CSPTA-Myristic</b> | 50                         | 0.01692           | ±0.5961         |
|                       | 100                        | 0.03317           | ±0.5694         |
|                       | 150                        | -0.4313           | ±0.4572         |
|                       | 200                        | -0.4287           | ±0.4625         |
|                       | 250                        | -0.1032           | ±0.6323         |
| <b>CSPTA-Lauric</b>   | 50                         | -0.4232           | ±0.4611         |
|                       | 100                        | -0.0942           | ±0.6135         |
|                       | 150                        | -0.9713           | ±0.4748         |
|                       | 200                        | -1.037            | ±0.4475         |
|                       | 250                        | -0.9813           | ±0.4699         |

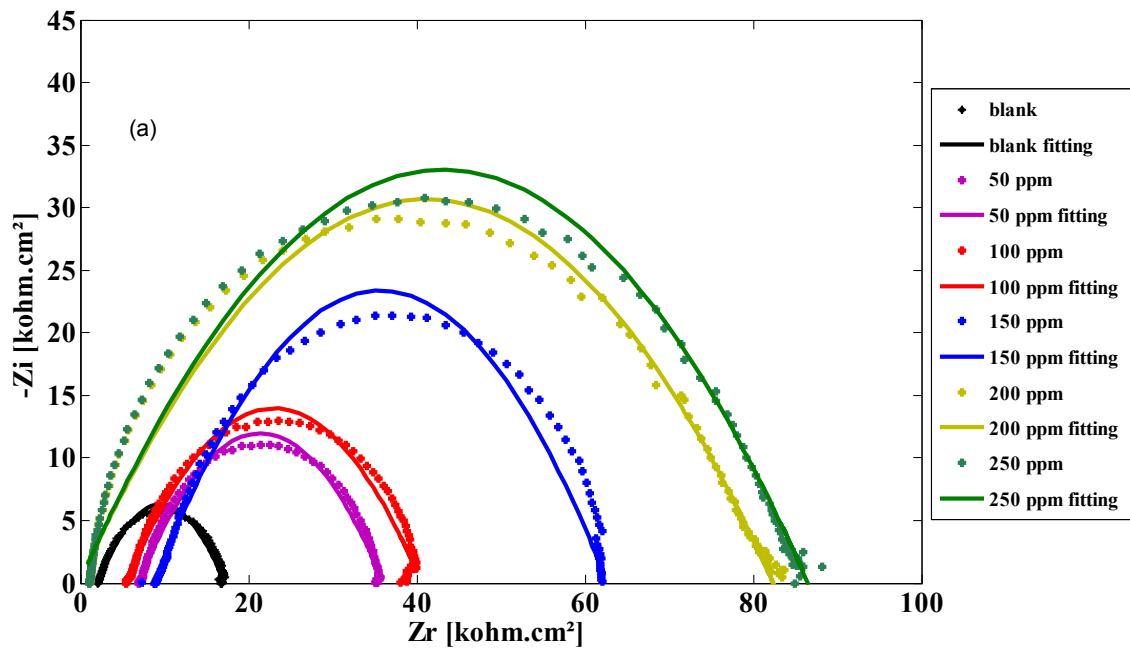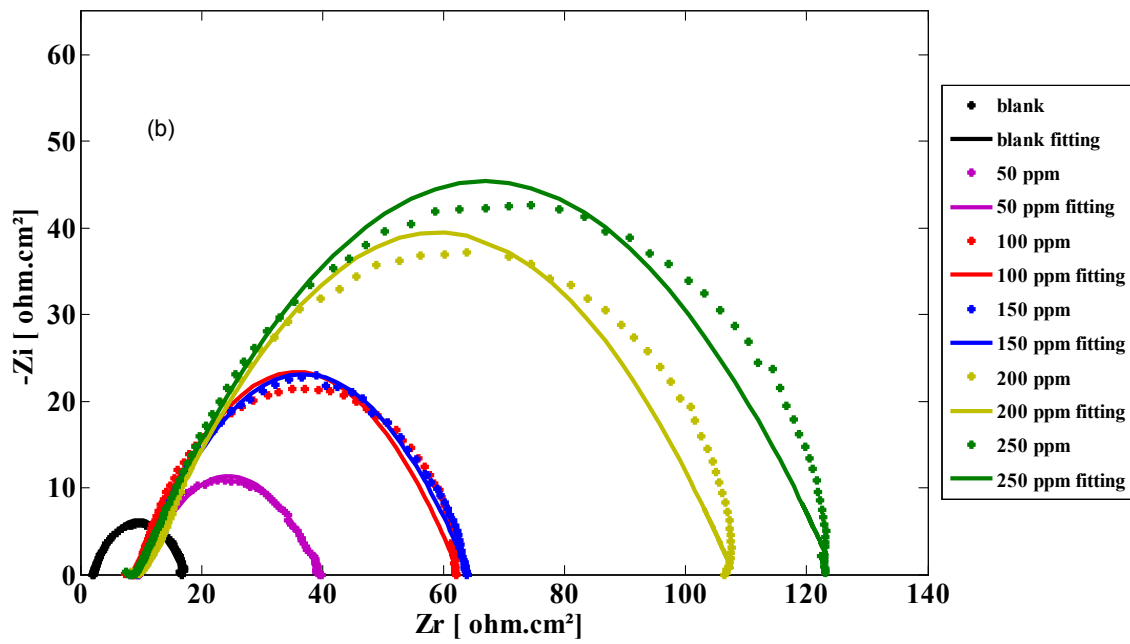

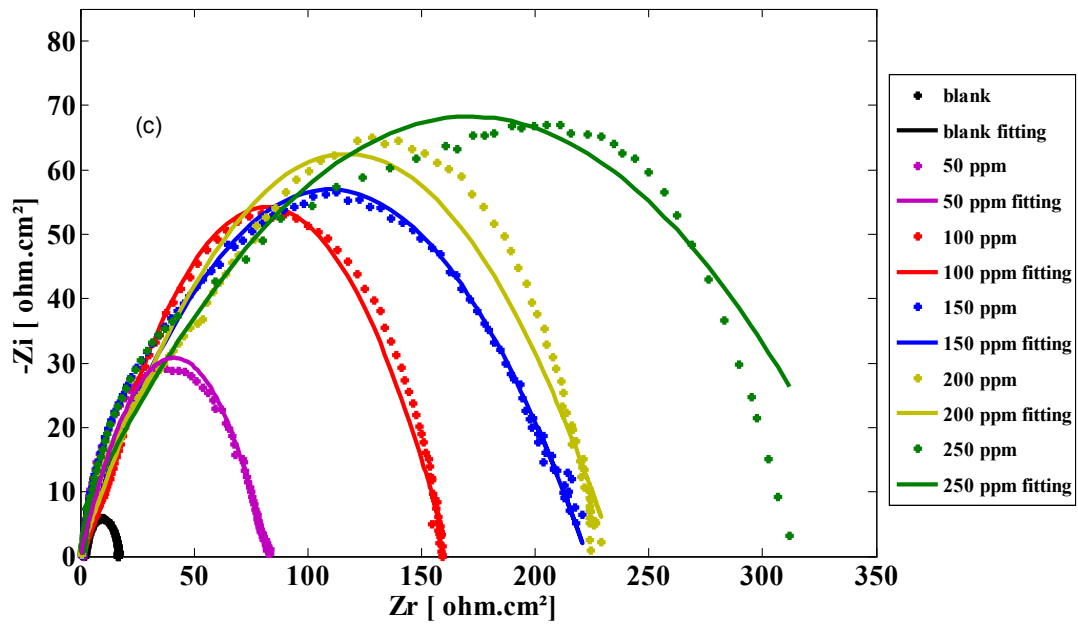

**S5:** Nyquist plots for carbon steel electrode in 1 M HCl solution with and without various concentrations of: (a) CSPTA-Stearic, (b) CSPTA-Palmitic, (c) CSPTA-Myristic.



**S6:** Values of Mean and standard deviation (SD) for  $-Z_i$  [ ohm.cm<sup>2</sup>] for carbon steel electrode at different concentrations of PILs inhibitors in 1 M HCl solution.

| <b>Inhibitor</b>      | <b>Concentration (ppm)</b> | <b>Mean value</b> | <b>SD value</b> |
|-----------------------|----------------------------|-------------------|-----------------|
| <b>blank</b>          | 000                        | 1.54              | ±1.903          |
| <b>CSPTA- Stearic</b> | 50                         | 2.96              | ±3.593          |
|                       | 100                        | 3.648             | ±4.245          |
|                       | 150                        | 5.308             | ±7.065          |
|                       | 200                        | 8.454             | ±9.501          |
|                       | 250                        | 8.865             | ±10.01          |
| <b>CSPTA-Palmitic</b> | 50                         | 2.831             | ±3.552          |
|                       | 100                        | 5.313             | ±7.152          |
|                       | 150                        | 5.454             | ±7.086          |
|                       | 200                        | 9.575             | ±12.14          |
|                       | 250                        | 11.71             | ±14.16          |
| <b>CSPTA-Myristic</b> | 50                         | 8.354             | ±9.411          |
|                       | 100                        | 16.47             | ±17.07          |
|                       | 150                        | 22.66             | ±18.61          |
|                       | 200                        | 23.93             | ±20.29          |
|                       | 250                        | 32.13             | ±21.75          |
| <b>CSPTA-Lauric</b>   | 50                         | 22.34             | ±18.412         |
|                       | 100                        | 24.24             | ±20.5           |
|                       | 150                        | 38.13             | ±51.42          |
|                       | 200                        | 61.02             | ±66.18          |
|                       | 250                        | 75.14             | ±97.22          |

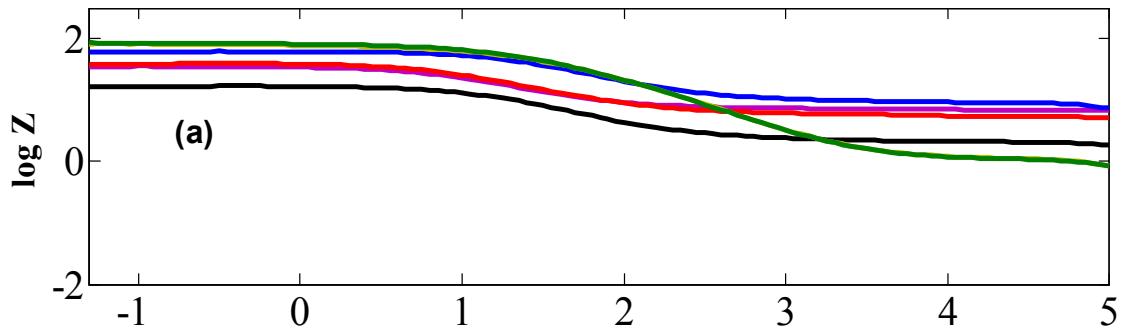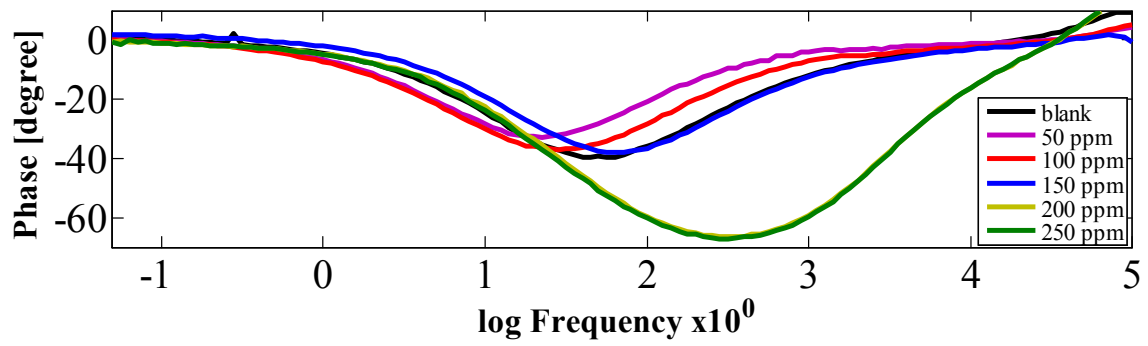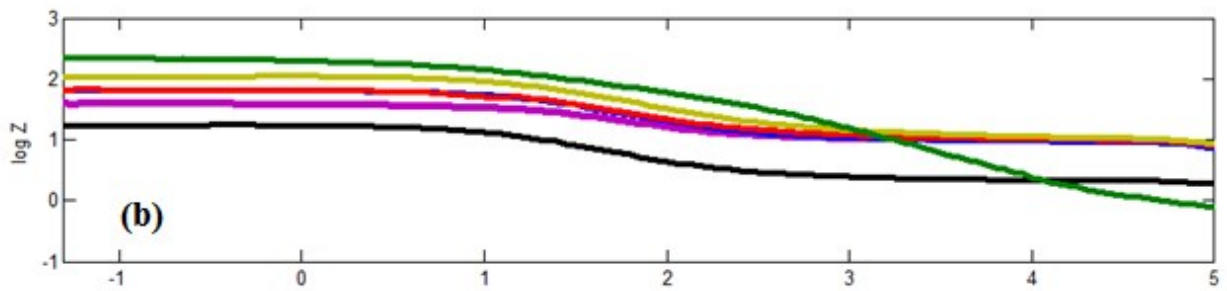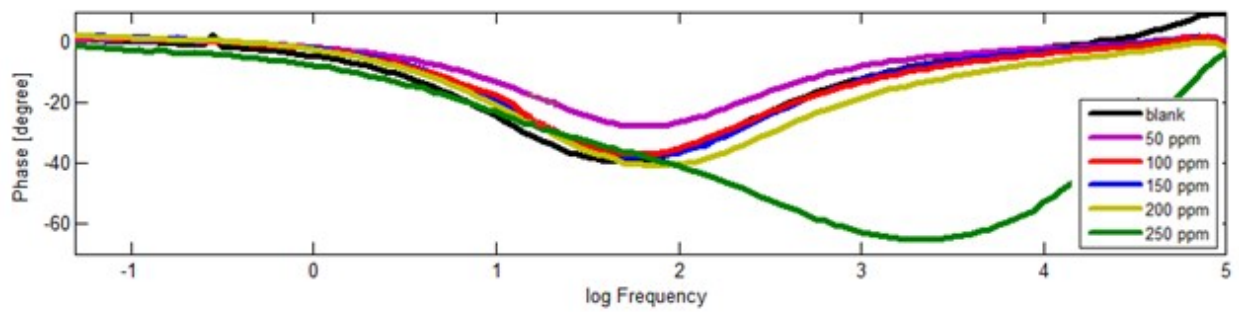

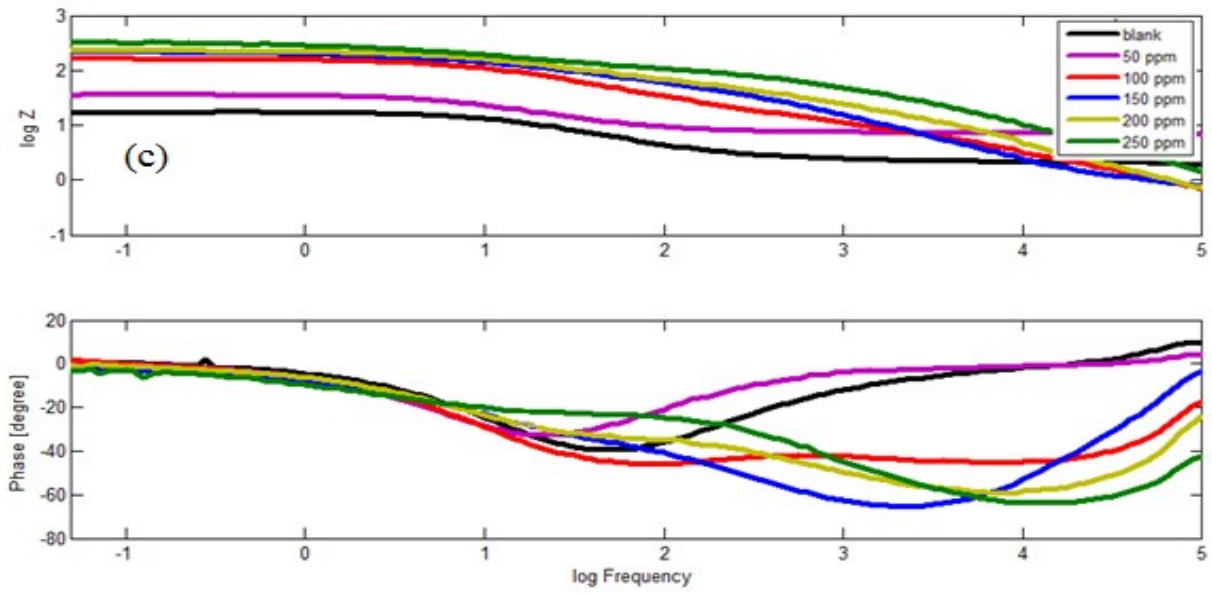

**S7:** Bode plots for carbon steel electrode in 1 M HCl solution with and without various concentrations of: (a) CSPTA-Stearic, (b) CSPTA-Palmitic, (c) CSPTA-Myristic.
